# Supplementary material
Source: publisher figshare collection journal article supplement (https://brill.figshare.com/articles/dataset/_/26394988)
Supplement: Supplementary file 1 [file 1]

**Museum collections as untapped sources of undescribed diversity  
of sponge-zoantharian associations with the description of six new  
species of *Umimayanthus* (Zoantharia: Parazoanthidae) from  
Western Australia and eastern Indonesia**

*Javier Montenegro* | ORCID: 0000-0002-0289-3274

Molecular Invertebrate Systematics and Ecology Laboratory, Graduate School of  
Engineering and Science, University of the Ryukyus, 1 Senbaru, Nishihara, Okinawa  
903-0213, Japan

Minderoo-UWA Deep-Sea Research Centre, School of Biological Sciences and  
Oceans Institute, The University of Western Australia, 35 Stirling Highway, Perth,  
WA 6009, Australia

*jmontzalez@gmail.com*

*Jane Fromont* | ORCID: 0000-0002-8887-4452

Collections and Research, Western Australian Museum, Welshpool, Western  
Australia, 6016, Australia

*Zoe Richards* | ORCID: 0000-0002-8947-8996

Collections and Research, Western Australian Museum, Welshpool, Western  
Australia, 6016, Australia

School of Molecular and Life Sciences, Curtin University, Kent St. Bently WA 6102,  
Australia

*Hiroki Kise* | ORCID: 0000-0002-4099-6469

Molecular Invertebrate Systematics and Ecology Laboratory, Graduate School of Engineering and Science, University of the Ryukyus, 1 Senbaru, Nishihara, Okinawa 903-0213, Japan

Geological Survey of Japan, National Institute of Advanced Industrial Science and Technology, AIST, 1-1-1 Higashi, Tsukuba, Ibaraki 305-8567, Japan

*Oliver Gomez* | ORCID: 0000-0002-9106-6261

Collections and Research, Western Australian Museum, Welshpool, Western Australia, 6016, Australia

*Bert W. Hoeksema* | ORCID: 0000-0001-8259-3783

Marine Evolution and Ecology Group, Naturalis Biodiversity Center, P.O. Box 9517, 2300 RA Leiden, The Netherlands

Groningen Institute for Evolutionary Life Sciences, University of Groningen, P.O. Box 11103, 9700 CC Groningen, The Netherlands

*James Davis Reimer* | ORCID: 0000-0003-0453-8804

Molecular Invertebrate Systematics and Ecology Laboratory, Graduate School of Engineering and Science, University of the Ryukyus, 1 Senbaru, Nishihara, Okinawa 903-0213, Japan

Tropical Biosphere Research Center, University of the Ryukyus, 1 Senbaru, Nishihara, Okinawa 903-0213, Japan

## Supplementary material

DATA S1     Aling\_150724\_Conc.

DATA S2     Aling\_150724\_ITS.

DATA S3     Aling\_150724\_16S

DATA S4     Aling\_150724\_COI.
